# Supplementary material for: Comparative Genomics Analyses Reveal Extensive Chromosome Colinearity and Novel Quantitative Trait Loci in Eucalyptus
Source: PLoS One. 2015 Dec 22;10(12):e0145144. doi: 10.1371/journal.pone.0145144 (PMC4687840; doi:10.1371/journal.pone.0145144)
Supplement: S3 Table — (DOC) [file pone.0145144.s005.doc]

**S3 Table. Pearson correlation coefficients between traits of the mapping population.**

| **Trait** | ***H*23** | ***H*32** | ***H*44** | ***H*56** | ***D*23** | ***D*32** | ***D*44** | ***D*56** | ***WD*56** |
| --- | --- | --- | --- | --- | --- | --- | --- | --- | --- |
| *H*10 | 0.68a | 0.57a | 0.55a | 0.52a | 0.72a | 0.67a | 0.54a | 0.45a | 0.43a |
| *H*23 |  | 0.75a | 0.60a | 0.61a | 0.69a | 0.66a | 0.50a | 0.43a | 0.37a |
| *H*32 |  |  | 0.71a | 0.71a | 0.64a | 0.72a | 0.59a | 0.55a | 0.37a |
| *H*44 |  |  |  | 0.94a | 0.65a | 0.75a | 0.81a | 0.81a | 0.57a |
| *H*56 |  |  |  |  | 0.68a | 0.79a | 0.85a | 0.85a | 0.61a |
| *D*23 |  |  |  |  |  | 0.93a | 0.80a | 0.76a | 0.43a |
| *D*32 |  |  |  |  |  |  | 0.93a | 0.91a | 0.51a |
| *D*44 |  |  |  |  |  |  |  | 0.99a | 0.59a |
| *D*56 |  |  |  |  |  |  |  |  | 0.59a |

Trait abbreviations are as illustrated in S1 Table. Phenotypic correlation between height and diameter of the same month (underlined) appears to increase with age.

a *P* < 0.001.
